# Supplementary material for: Acid green crystal-based in situ synthesis of polyaniline hollow nanotubes for the adsorption of anionic and cationic dyes
Source: Royal Society of Chemistry journal article supplement (doi:10.1039/c8ra02236d), 2018-01-01
Supplement: c8ra02236d1.pdf [file c8ra02236d1.pdf]

**Acid green crystals-based *in situ* synthesis of polyaniline hollow  
nanotubes for adsorption of anionic and cationic dyes**

Wael A. Amer<sup>a</sup>, Mohamed M. Omran<sup>a</sup>, Ahmed F. Rehab and Mohamad M. Ayad<sup>a,b\*</sup>

<sup>a</sup> *Chemistry Department, Faculty of Science, Tanta University, Tanta 31527, Egypt*

<sup>b</sup> *Institute of Basic and Applied Sciences, Egypt-Japan University of Science and  
Technology, New Borg El-Arab City, Alexandria 21934, Egypt*

---

\*Corresponding author: Tel.: +20 3 459 9520; fax: +20 3 459 9520  
E-mail: mohamad.ayad@ejust.edu.eg

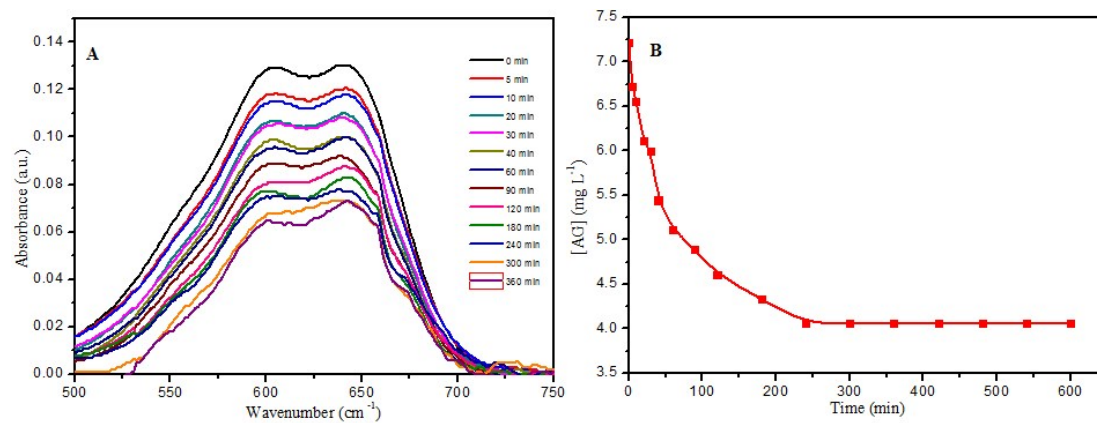

Figure S1. A) UV-VIS spectrum of removal of AG dye from aqueous solution by PANI-HNTs, B) Effect of contact time on the removal of AG dye (PANI-HNTs = 10 mg, [AG] = 7.2 mg L<sup>-1</sup>, pH = 3).

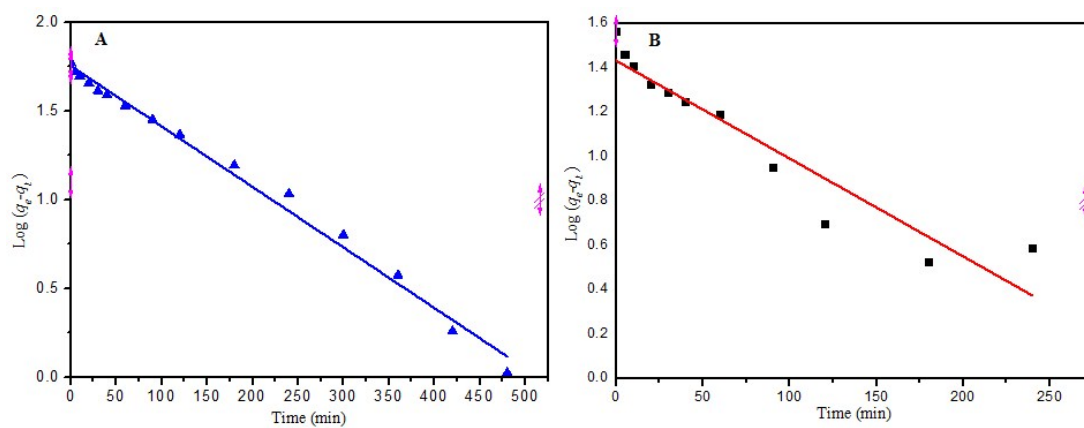

Figure S2. A) Pseudo-first-order reaction for MB adsorption onto PANI-HNTs at pH 9, B) Pseudo-first-order reaction for AG adsorption onto PANI-HNTs at pH 3.

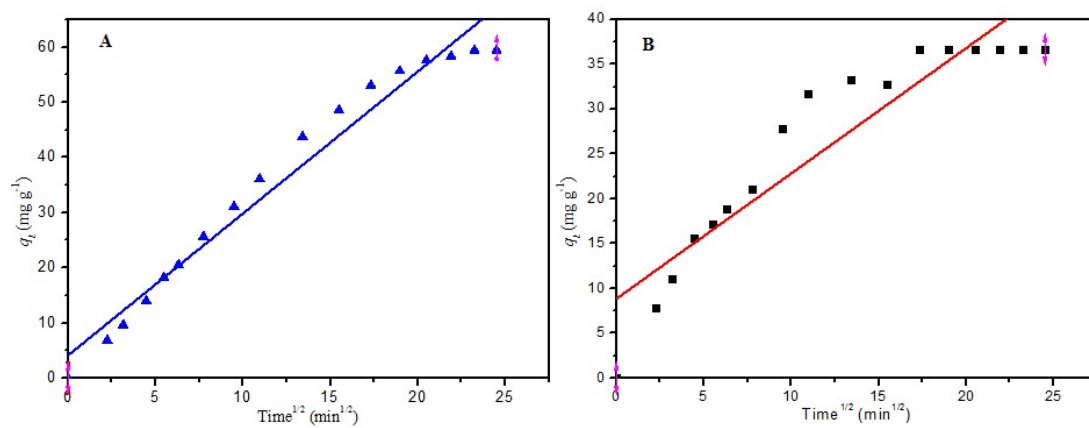

Figure S3. A) Intraparticle diffusion model plots of MB adsorption onto PANI-HNTs at pH 9. B) Intraparticle diffusion model plots of AG adsorption onto PANI-HNTs at pH 3.

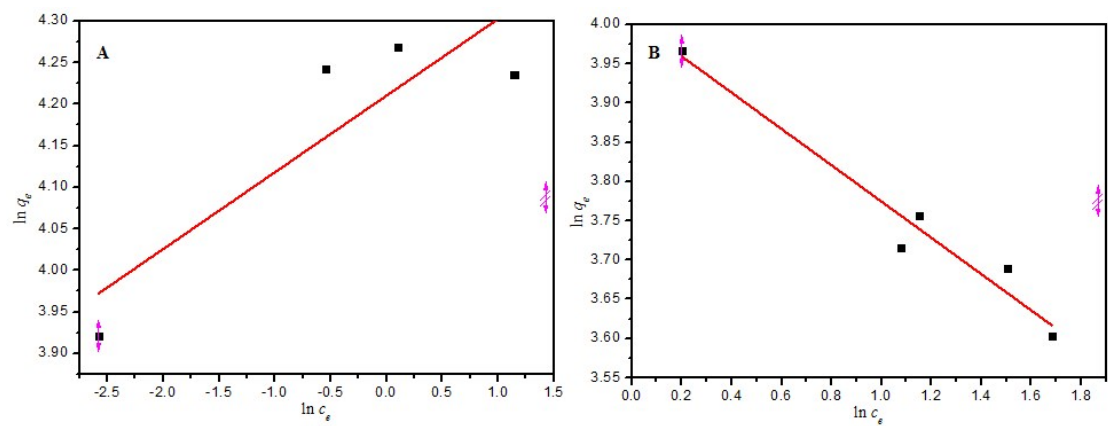

Figure S4. A) Freundlich isotherm for adsorption of MB (PANI-HNTs = 10 mg, [MB] = 5-10 mg L<sup>-1</sup>), at pH = 9, B) Freundlich isotherm for adsorption of AG (PANI-HNTs = 10 mg, [AG] = 5-10 mg L<sup>-1</sup>), at pH = 3.

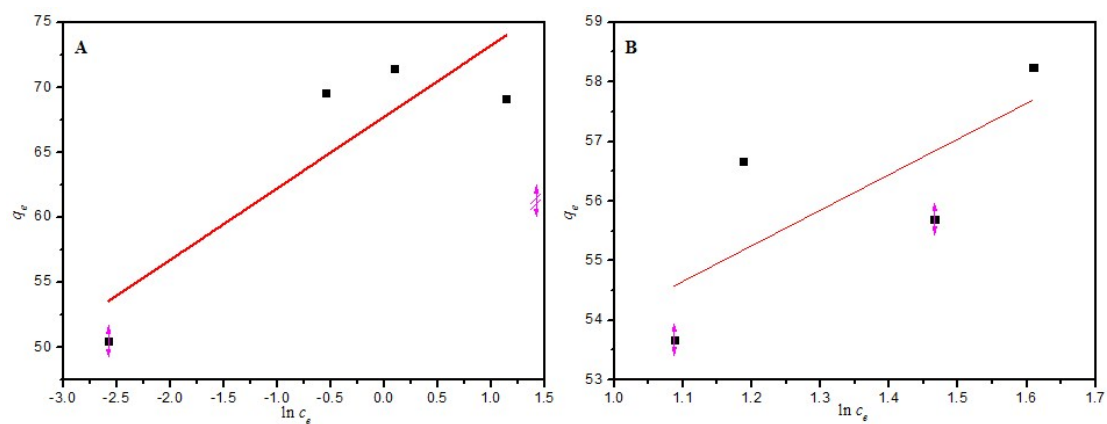

Figure S5. A) Temkin isotherm for adsorption of MB (PANI-HNTs = 10 mg, [AG] = 5-10 mg L<sup>-1</sup>), at pH = 9, B) Temkin isotherm for adsorption of AG (PANI-HNTs = 10 mg, [AG] = 5-10 mg L<sup>-1</sup>), at pH = 3.
